# Supplementary material for: Neonatal Respiratory Morbidity among Late Preterm Births by Planned Mode of Delivery and Gestational Age
Source: bioRxiv or medRxiv preprint supplement (doi:10.1101/2024.01.04.23299873), 2024-05-27

## Neonatal Respiratory Morbidity among Late Preterm Births by Planned Mode of Delivery and Gestational Age

Online Supplement

eTable 1: Sample sizes of strata

| Week of Gestation at Presentation | Planned Vaginal Delivery<br>n=2,351 | Planned Cesarean Delivery<br>n=474 |
|-----------------------------------|-------------------------------------|------------------------------------|
| 34 weeks                          | 644 (27.4%)                         | 98 (20.8%)                         |
| 35 weeks                          | 887 (37.7%)                         | 213 (44.9%)                        |
| 36 weeks                          | 820 (34.9%)                         | 163 (34.3%)                        |

eTable 2: Distribution of patent factors between the control and treatment groups

| Factor                                               | Control<br>n=1,399 | Treatment<br>n=1,426 | P<br>value |
|------------------------------------------------------|--------------------|----------------------|------------|
| Gestational age at randomization (days) <sup>1</sup> | 248.4 (5.5)        | 248.6 (5.4)          | 0.31       |
| Gestational age at randomization (weeks)             |                    |                      | 0.21       |
| 34 weeks                                             | 388 (27.7%)        | 354 (24.8%)          |            |
| 35 weeks                                             | 534 (38.2%)        | 566 (26.7%)          |            |
| 36 weeks                                             | 477 (34.1%)        | 506 (35.5%)          |            |
| Planned Mode of Delivery                             |                    |                      | 0.70       |
| Vaginal                                              | 1,173 (83.8%)      | 1,178 (82.6%)        |            |
| Cesarean                                             | 226 (16.2%)        | 248 (17.4%)          |            |

<sup>1</sup> Presented as mean (standard deviation).

eTable 3: Observed rates and corresponding 95% confidence intervals of respiratory morbidity among the neonates not exposed and exposed to antenatal steroids, stratified by planned mode of delivery and week of gestation

| Week of Gestation at Presentation | Planned Vaginal Delivery |                    | Planned Cesarean Delivery |                    |
|-----------------------------------|--------------------------|--------------------|---------------------------|--------------------|
|                                   | No ALPS<br>% (95% CI)    | ALPS<br>% (95% CI) | No ALPS<br>% (95% CI)     | ALPS<br>% (95% CI) |
| 34 weeks                          | 20.5 (16.2-24.8)         | 17.6 (13.3-21.9)   | 39.2 (25.6-52.7)          | 31.9 (18.4-45.4)   |
| 35 weeks                          | 12.1 (9.1-15.2)          | 10.2 (7.4-13.0)    | 25.8 (17.0-34.5)          | 12.7 (6.1-18.0)    |
| 36 weeks                          | 5.3 (3.1-7.5)            | 6.2 (3.9-8.5)      | 16.7 (8.3-25.0)           | 11.8 (4.9-18.7)    |

ALPS, antenatal late preterm steroids.

eTable 4: Unadjusted and adjusted risk of respiratory morbidity

| Model Term               | Unadjusted Risk Ratio<br>(95% CI) | Adjusted Risk Ratio<br>(95% CI) |
|--------------------------|-----------------------------------|---------------------------------|
| Treatment Group          |                                   |                                 |
| Placebo                  | Reference                         | Reference                       |
| Antenatal Steroids       | 0.81 (0.66, 0.98)                 | 0.81 (0.68, 0.97)               |
| Planned Mode of Delivery |                                   |                                 |
| Vaginal                  | Reference                         | Reference                       |
| Cesarean                 | 1.79 (1.45, 2.20)                 | 1.90 (1.55, 2.33)               |
| Week of Gestation (days) | 0.92 (0.91, 0.94)                 | 0.90 (0.90, 0.94)               |

CI, confidence interval.

eTable 5: Observed rates and corresponding 95% confidence intervals of severe respiratory complications among the neonates not exposed to antenatal steroids, stratified by planned mode of delivery and week of gestation

| Week of Gestation at Presentation | Planned Vaginal Delivery |                 | Planned Cesarean Delivery |                  |
|-----------------------------------|--------------------------|-----------------|---------------------------|------------------|
|                                   | No ALPS                  | ALPS            | No ALPS                   | ALPS             |
| 34 weeks                          | 15.7 (11.8-19.6)         | 13.7 (9.8-17.5) | 37.3 (23.9-50.7)          | 23.4 (11.1-35.6) |
| 35 weeks                          | 10.5 (7.6-13.4)          | 6.2 (4.0-8.5)   | 23.7 (15.2-32.2)          | 9.5 (4.1-14.8)   |
| 36 weeks                          | 4.3 (2.3-6.2)            | 3.3 (1.6-5.0)   | 12.8 (5.4-20.3)           | 8.2 (2.4-14.1)   |

ALPS, antenatal late preterm steroids.

eTable 6: Unadjusted and adjusted risk of severe respiratory complications

| Model Term               | Unadjusted Risk Ratio<br>(95% CI) | Adjusted Risk Ratio<br>(95% CI) |
|--------------------------|-----------------------------------|---------------------------------|
| Treatment Group          |                                   |                                 |
| Placebo                  | Reference                         | Reference                       |
| Antenatal Steroids       | 0.66 (0.53, 0.83)                 | 0.66 (0.53, 0.83)               |
| Planned Mode of Delivery |                                   |                                 |
| Vaginal                  | Reference                         | Reference                       |
| Cesarean                 | 2.00 (1.58, 2.54)                 | 2.16 (1.71, 2.72)               |
| Week of Gestation (days) | 0.92 (0.90, 0.94)                 | 0.92 (0.90, 0.94)               |

CI, confidence interval.

eFigure 1: Cross-validated receiver operating characteristic curves for model predicting the primary outcome (respiratory morbidity)

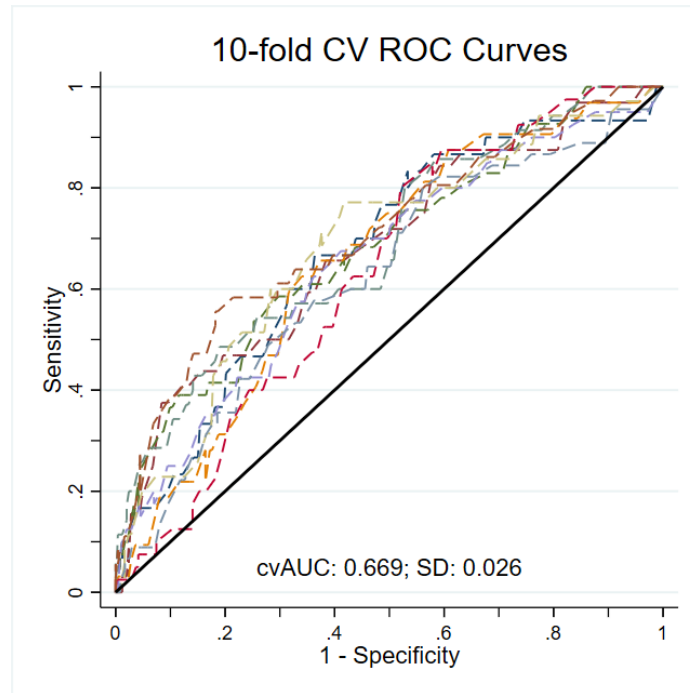

eFigure 2: Calibration plot for the model predicting the primary outcome (respiratory morbidity)

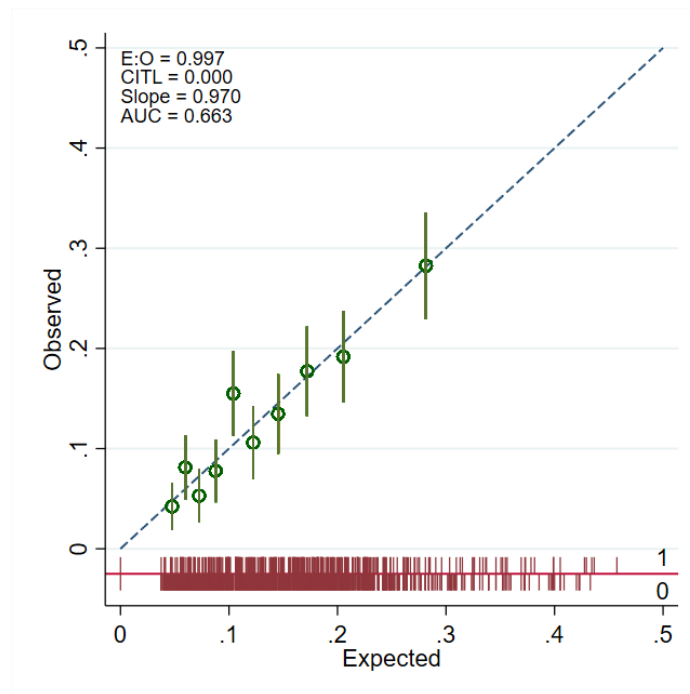

eFigure 3: Cross-validated receiver operating characteristic curves for the model predicting the secondary outcome (severe respiratory complications)

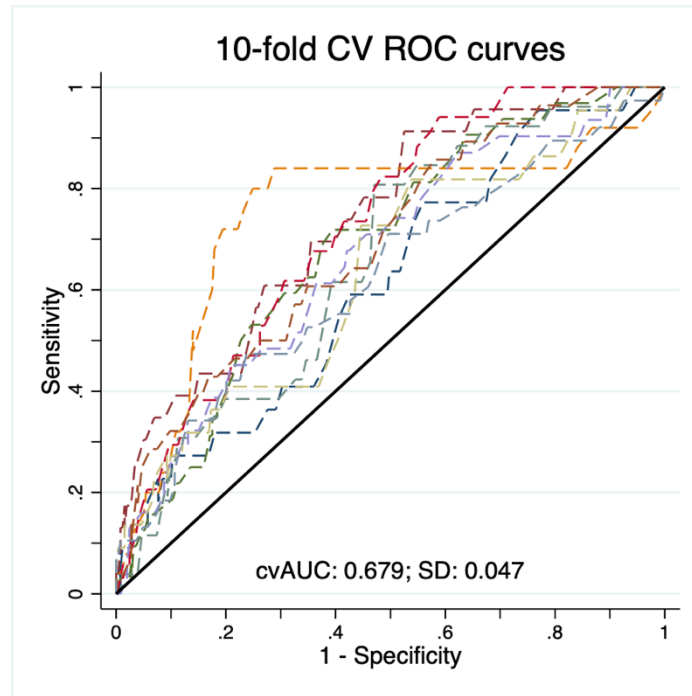

eFigure 4: Calibration plot for the model predicting the secondary outcome (severe respiratory complications)

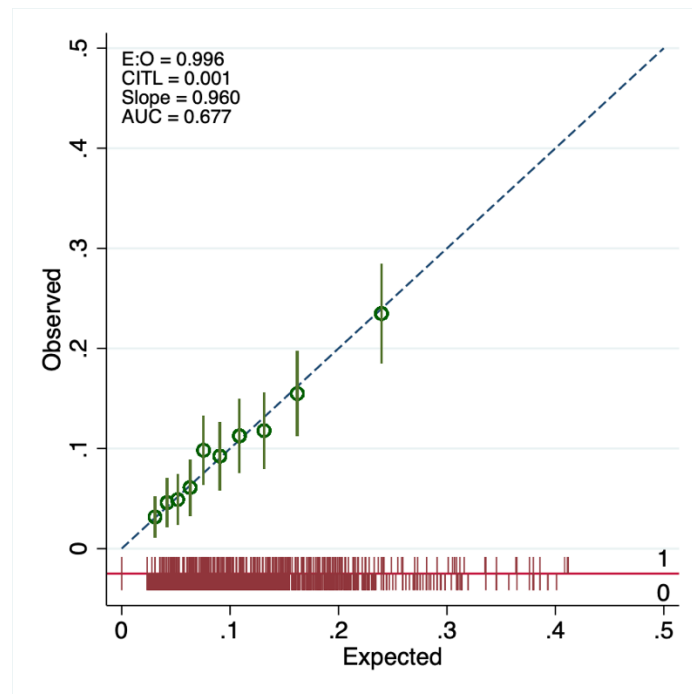

Supplement: Supplementary file [file media-1.pdf]
